# Supplementary material
Source: publisher figshare collection journal article supplement (https://gsapubs.figshare.com/ndownloader/files/23298896)
Supplement: Supplementary file 1 [file 23298896]

## Sheet: Data
Sample & Loction	SiO2	TiO2	Al2O3	Fe2O3	FeO	MnO	MgO	CaO	Na2O	K2O	P2O5	TP	XFo1	F2	TOL3	Pi4	Pf		Reference	Lat	Long	Other information
Baffin Island
BI/PI/44	46.5731	0.781676	11.4946	0.392225	10.2419	0.183301	19.6818	9.41469	1.14185	0.0239788	0.0707947	1565.18	0.916086	0.291105	1529.14	4.50119	1.74127		Starkey et al. 2009	67.18	-62.44
BI/PI/28	47.1452	0.717676	11.157	0.355844	10.1914	0.17149	19.6806	9.45694	1.0167	0.0472883	0.0598985	1565.16	0.918688	0.302343	1523.99	4.50054	1.63289		Starkey et al. 2009	67.18	-62.44
BI/DI/25	46.3773	0.746141	11.5468	0.370369	10.2458	0.170977	19.646	9.75095	1.07906	0.0170378	0.0494908	1564.46	0.919301	0.288408	1531.24	4.48267	1.80012		Starkey et al. 2009	67.09	-62.16
BI/CS/28	46.7495	0.884457	11.2035	0.439565	10.2036	0.173833	19.6424	9.73431	0.817592	0.0712096	0.0800009	1564.38	0.915905	0.296807	1527.13	4.4808	1.71414		Starkey et al. 2009	67.22	-62.53
BI/CS/5	46.8006	0.883891	11.5589	0.440261	10.116	0.166554	19.3622	9.43099	1.1131	0.041628	0.0859709	1558.66	0.915391	0.290702	1530.6	4.34164	1.89958		Starkey et al. 2009	67.22	-62.53
BI/DI/14	46.9419	0.788152	11.3536	0.393567	10.0921	0.174607	19.2874	9.61865	1.29086	0.020382	0.0388229	1557.12	0.915265	0.289077	1531.17	4.30618	1.94198		Starkey et al. 2009	67.09	-62.16
BI/CS/8	47.4489	0.517561	11.3542	0.256323	10.0394	0.172013	19.2831	9.76894	1.07053	0.0505107	0.0384484	1557.03	0.914856	0.300163	1525.61	4.30419	1.82405		Starkey et al. 2009	67.22	-62.53
PAD4	46.9783	0.815811	11.5846	0.408513	10.0555	0.184571	19.2119	9.54313	1.12037	0.0338226	0.0634173	1555.56	0.915027	0.290712	1530.27	4.27111	1.95324		Starkey et al. 2009	67.18	-62.44
PAD8	46.8637	0.832201	11.341	0.416446	10.0544	0.179801	19.1536	9.71734	1.32271	0.0465014	0.0723355	1554.36	0.915169	0.285781	1532.41	4.24449	2.02353		Starkey et al. 2009	67.18	-62.44
PAD2	46.7669	0.866536	11.366	0.4339	10.0168	0.17249	19.0139	10.0148	1.2442	0.0313663	0.073188	1551.45	0.918122	0.281823	1533.5	4.18238	2.10497		Starkey et al. 2009	67.18	-62.44
BI/DI/20	46.8094	0.78786	11.9956	0.39006	9.98161	0.171979	18.9539	9.56872	1.23531	0.0411772	0.0643861	1550.2	0.914802	0.283489	1531.78	4.15644	2.09219		Starkey et al. 2009	67.09	-62.16
BI/CS/12	47.3001	0.523392	11.6585	0.259614	9.9213	0.171581	18.8685	9.95409	1.28813	0.0373717	0.0174931	1548.42	0.914466	0.29052	1527.98	4.12028	2.04467		Starkey et al. 2009	67.22	-62.53
BI/DI/26	47.0914	0.773489	11.8902	0.385133	9.89708	0.169338	18.7679	9.72769	1.19577	0.0352243	0.0667408	1546.3	0.914301	0.285362	1528.54	4.07879	2.09883		Starkey et al. 2009	67.09	-62.16
BI/CS/27	46.9058	0.892389	11.8053	0.443308	9.88911	0.170665	18.7146	9.84899	1.14678	0.0992737	0.0838692	1545.18	0.914412	0.282516	1529.3	4.05731	2.13799		Starkey et al. 2009	67.22	-62.53
BI/PI/30	47.0715	0.842059	11.9218	0.420526	9.83987	0.171886	18.5946	9.86059	1.17786	0.0301767	0.0691143	1542.64	0.914056	0.28278	1527.28	4.01015	2.14413		Starkey et al. 2009	67.18	-62.44
BI/PI/16	47.549	0.53087	11.7435	0.263979	9.77909	0.167734	18.5181	10.2081	1.15893	0.038631	0.0420649	1541.02	0.91367	0.289429	1522.36	3.981	2.0686		Starkey et al. 2009	67.18	-62.44
BI/CS/18	46.6382	0.795821	12.5791	0.396373	9.81319	0.172014	18.4281	9.82785	1.24406	0.0326906	0.0726457	1539.1	0.914141	0.272701	1528.76	3.9475	2.24801		Starkey et al. 2009	67.22	-62.53
AP05	47.0783	0.993036	11.6194	0.496092	9.77026	0.174506	18.3643	10.0461	1.33074	0.0479458	0.0792573	1537.74	0.913801	0.27678	1525.46	3.92435	2.20219		Starkey et al. 2009	66.93	-61.74
BI/DI/27	47.5564	0.714651	11.8652	0.357439	9.70796	0.169678	18.302	9.9427	1.28129	0.0427096	0.0599968	1536.4	0.913299	0.284919	1519.64	3.90216	2.1007		Starkey et al. 2009	67.09	-62.16
BI/CS/25	47.2866	0.753127	12.5085	0.374983	9.6935	0.169864	18.2405	9.64568	1.17465	0.0759001	0.0767517	1535.08	0.916492	0.28257	1519.41	3.88068	2.12202		Starkey et al. 2009	67.22	-62.53
PAD6	47.4568	0.83755	11.8793	0.418356	9.66819	0.173316	18.1583	10.0114	1.29549	0.0350659	0.0662357	1533.31	0.913181	0.282457	1518.28	3.85264	2.13242		Starkey et al. 2009	67.18	-62.44
BI/CS/6	47.1	0.77332	12.22	0.38485	9.68157	0.173779	18.1027	9.79938	1.6112	0.101576	0.0516636	1532.11	0.913561	0.27299	1521.12	3.8341	2.219		Starkey et al. 2009	67.22	-62.53
BI/CS/14	47.3068	0.803733	12.6257	0.400312	9.62152	0.169829	18.0386	9.83031	1.093	0.0409876	0.0692235	1530.71	0.912898	0.279961	1515.22	3.81311	2.11673		Starkey et al. 2009	67.22	-62.53
DUR7	47.1015	0.888516	12.454	0.44366	9.60094	0.175954	17.9885	9.84182	1.01807	0.39625	0.0908281	1529.62	0.913263	0.28168	1513.73	3.79704	2.10559		Starkey et al. 2009	67.22	-62.53
BI/PI/19	47.3238	0.880897	12.3176	0.437924	9.6009	0.168067	17.9483	9.69399	1.44417	0.0993931	0.0849514	1528.75	0.916234	0.276421	1514.54	3.78433	2.14092		Starkey et al. 2009	67.18	-62.44
BI/CS/19	47.3563	0.804807	12.521	0.399909	9.52995	0.167781	17.7694	10.1299	1.18995	0.0586477	0.0722471	1524.83	0.915806	0.27473	1509.07	3.72984	2.09835		Starkey et al. 2009	67.22	-62.53
DUR6	47.783	0.749637	12.0932	0.374292	9.50594	0.172035	17.7672	10.1505	1.29767	0.0416418	0.0648837	1524.78	0.915595	0.281886	1506.04	3.72917	2.03316		Starkey et al. 2009	67.09	-62.16
DUR3	47.506	0.753598	12.379	0.376793	9.43858	0.17389	17.4975	10.4097	1.3866	0.0180861	0.0602869	1518.81	0.912143	0.268958	1501.78	3.65323	2.05763		Starkey et al. 2009	67.09	-62.16
BI/DI/22	47.389	0.834968	12.911	0.428209	9.4178	0.168013	17.4559	9.94943	1.31188	0.0563491	0.07748	1517.88	0.915332	0.269905	1499.68	3.64213	2.03009		Starkey et al. 2009	67.09	-62.16
CAMP - USA																						Norm
NTQ-11	46.705	0.366383	16.7162	0.182508	8.84161	0.142198	14.9883	10.2509	1.59695	0.146007	0.0638779	1458.87	0.909382	0.123565	1461.28	3.20074	2.32605		Grossman et al. 1991	36	-78.9	Ol
NTQ-9	45.5044	0.298796	18.3924	0.149199	8.7617	0.139743	14.4505	10.7921	1.42461	0.0288773	0.0577546	1444.75	0.904838	0.0743321	1455.47	3.12452	2.46285		Grossman et al. 1991	36	-78.9	Ol
DBF-8514	46.6165	0.409825	17.1398	0.204041	8.74393	0.141075	14.6277	9.97029	1.91621	0.168556	0.0620995	1449.46	0.905114	0.102025	1453.8	3.15065	2.33663		Grossman et al. 1991	36	-78.9	Ol
DBF-8515	45.5428	0.305562	19.5081	0.152691	8.31856	0.140234	13.4768	10.6441	1.59587	0.128063	0.18717	1417.73	0.903405	0.0623406	1416.99	2.93717	2.09721		Grossman et al. 1991	36	-78.9	Ol
MM8818	49.7654	0.626286	13.4273	0.310892	8.45933	0.152703	15.2624	9.91228	1.67962	0.33108	0.072676	1465.86	0.907609	0.277759	1365.17	3.23779	0.237247		Grossman et al. 1991	36	-78.9	Qz
MM902	50.9571	0.579377	11.8108	0.288351	8.40778	0.159718	15.2796	10.6998	1.45049	0.305827	0.0611654	1466.3	0.910185	0.2955	1355.15	3.24012	0.0427629		Grossman et al. 1991	39.8	-77.2	Qz
D193	50.7878	0.613842	12.0987	0.305225	8.61075	0.160997	15.8227	10.0609	1.2209	0.240741	0.0773811	1479.78	0.906931	0.304078	1389.79	3.31677	0.476421		Grossman et al. 1991	39.8	-77.2	Qz
D183	50.7278	0.569969	11.741	0.28339	8.70927	0.160745	16.0833	10.2218	1.19367	0.231864	0.0772882	1486.1	0.907419	0.306294	1405.47	3.35712	0.672914		Grossman et al. 1991	39.8	-77.2	Qz
D182	50.7112	0.57591	11.4698	0.286219	8.90855	0.158881	16.6466	9.76965	1.16171	0.23571	0.075764	1499.43	0.908309	0.317718	1434.01	3.45709	1.00406		Grossman et al. 1991	39.8	-77.2	Qz
D180	50.178	0.613462	11.5406	0.304928	8.98879	0.168869	16.7759	9.78617	1.279	0.279517	0.0847022	1502.43	0.909124	0.308409	1445.8	3.48306	1.18781		Grossman et al. 1991	39.8	-77.2	Qz
D192	49.985	0.601275	11.8445	0.298574	9.0254	0.158502	16.8512	9.7468	1.16157	0.245403	0.0818011	1504.16	0.909126	0.307001	1450.76	3.49874	1.25737		Grossman et al. 1991	39.8	-77.2	Qz
CAMP - Iberia
P11	49.8727	0.680814	13.4278	0.33838	8.16981	0.152087	14.53	10.5726	1.62088	0.509659	0.125326	1446.87	0.910253	0.268242	1377	3.13641	0.781652		Bertrand & Millot 1987	-4.7	-8.63	Messejana-Plasencia intrusion
15	49.0744	0.449341	14.8923	0.223824	7.98857	0.14123	13.5316	11.6844	1.68316	0.277542	0.0537177	1419.3	0.903507	0.173726	1314	2.95066	1.2462		Cebria et al. 2003	40.65	-4.7	Messejana-Plasencia intrusion
597-20	47.7708	0.627092	9.5645	0.309839	10.1086	0.186671	19.5787	9.67791	1.65482	0.443634	0.0774599	1563.09	0.915946	0.3117	1520	4.44831	1.5879		Martins et al. 2008	37.3	-7.5	Algarve Basin
E5-1	46.7305	0.572628	11.0803	0.282995	10.2253	0.165364	19.7382	9.54923	1.10368	0.466942	0.0848985	1566.33	0.916389	0.298991	1525	4.53068	1.62449		Martins et al. 2008	37.3	-7.5	Algarve Basin
587-16	48.8475	0.631823	11.4341	0.313685	9.36307	0.129736	17.586	9.81201	1.4446	0.346704	0.0908034	1520.78	0.911688	0.298542	1490	3.67734	1.76723		Martins et al. 2008	37.3	-7.5	Algarve Basin
597-19	47.9728	0.630208	9.96464	0.311653	9.96807	0.177305	19.1769	9.63865	1.68148	0.405874	0.0724774	1554.84	0.915118	0.30699	1522	4.25506	1.78647		Martins et al. 2008	37.3	-7.5	Algarve Basin
R2-4	47.612	0.703051	12.1451	0.348318	9.37668	0.162134	17.4221	10.4272	1.25394	0.464424	0.0851444	1517.12	0.912322	0.277109	1495	3.63326	1.93733		Martins et al. 2008	37.3	-7.5	Algarve Basin
587-10	47.6273	0.69533	10.1702	0.344097	10.0529	0.168503	18.5757	9.79827	1.92398	0.540195	0.103599	1542.24	0.912671	0.231889	1550	4.0029	2.65605		Martins et al. 2008	37.3	-7.5	Algarve Basin
Ferrar dolerite
Z498.9B (Theron Mountains)	49.1198	0.555049	14.2907	0.275882	8.62772	0.112833	15.6593	9.95351	1.10353	0.215533	0.0862131	1475.77	0.907624	0.278004	1394	3.29287	0.62539		Brewer et al. 1992	-80	-20
4141	51.2899	0.326479	13.3673	0.16252	8.02239	0.190799	14.3471	10.7562	1.14203	0.360179	0.0351394	1441.98	0.904118	0.290866	1356	3.10855	0.449838		Gunn 1966	-77.27	161.25
4124	51.4546	0.421546	11.5115	0.209287	8.63363	0.202703	16.0526	9.82342	1.10799	0.533476	0.0492439	1485.36	0.910774	0.326199	1392	3.3522	0.41724		Gunn 1966	-77.27	161.25
4048	49.4251	0.37745	13.1801	0.187239	8.68229	0.183853	15.8477	10.4272	1.20311	0.390413	0.0956113	1480.39	0.90829	0.285653	1403	3.32051	0.714409		Gunn 1966	-77.27	161.25
4040	50.6843	0.393638	15.9459	0.196306	6.90569	0.17425	11.5183	12.4897	1.28066	0.35522	0.0560873	1312.86	0.9	0.23	1288	1.9	0.4		Gunn 1966	-77.27	161.25
TPS-13	51.1475	0.40233	13.3803	0.199922	8.13164	0.152442	14.6212	10.0738	1.34114	0.491475	0.0583106	1449.29	0.905258	0.29543	1367	3.14971	0.530807		Wilhelm et al. 1996	-75.48	160.28
TPS-24	50.9348	0.374867	15.4375	0.186711	7.2672	0.132134	12.4533	10.9018	1.40478	0.853538	0.0533461	1387	0.903	0.33	1387	2.6	0.2		Wilhelm et al. 1996	-75.48	160.28
154-B	51.6221	0.411121	11.2978	0.204212	8.66731	0.181581	16.1729	9.72032	1.19193	0.475105	0.0555956	1488.25	0.91092	0.328555	1396	3.37176	0.462142		Zavala et al. 2011	-77.6	163
Karoo
N77	46.5617	1.32788	7.51409	0.658582	11.1813	0.160739	23.5992	7.5	1.06016	0.449763	0.16063	1639.75	0.923476	0.385162					Ellam & Cox 1989	-25.7	30.5
ZCH-1	44.6316	0.8623	7.13116	0.426133	8.36432	0.150546	23.6885	7.69999	5.02837	1.42044	0.597	1641.36	0.947064	0.71828					Harmer et al. 1998	-21	34
SA.20.1 (Ferrar type)	48.6347	0.73083	11.9319	0.363387	9.21777	0.158569	17.1208	9.74711	1.6673	0.29071	0.136805	1510.33	0.914574	0.285272	1477	3.55875	1.7		Riley et al. 2006	-30.2402	29.3275
Dronning Maud Land
AL/B7-03 (Ahlmannryggen)	45.9308	1.4046	7.08221	0.697813	11.4289	0.185749	24.1894	7.62741	1.15755	0.18882	0.106724	1650.29	0.927319	0.378723					Heinonen & Luttinen 2010	-74.2	-14
AL/B16-98 (Ahlmannryggen)	44.3409	1.9629	6.94138	0.973905	12.72	0.183818	23.4744	7.73087	1.2854	0.220804	0.165603	1637.5	0.916615	0.136734	15905		55		Heinonen & Luttinen 2010	-74.2	-14
AL/B20A-98 (Ahlmannryggen)	43.5375	2.41798	6.53846	1.19502	13.083	0.161679	23.2756	8.04548	1.03732	0.413527	0.294375	1633.91	0.914976	0.07765					Heinonen & Luttinen 2010	-74.2	-14
AL/WM1E-98 (Ahlmannryggen)	43.2001	1.78828	7.63309	0.889796	13.5322	0.188816	23.0722	7.78692	1.31535	0.429853	0.163344	1630.21	0.911862	0.0245399					Heinonen & Luttinen 2010	-74.2	-14
SK221-AVL	47.4117	0.778002	6.96547	0.385972	10.8978	0.174848	23.8483	8.25398	0.984624	0.220556	0.0787699	1644.22	0.925285	0.438265					Heinonen et al. 2010	-74.2	-14
SK225-AVL	46.8976	0.934348	8.44995	0.463215	11.1005	0.174384	23.4807	7.55738	0.640781	0.154405	0.146685	1637.62	0.923071	0.391					Luttinen & Furnes 2000	-74.2	-14
VF-106-85	45.7554	0.887477	9.68825	0.436683	11.1792	0.172377	21.7117	8.90811	1.02098	0.0738055	0.166062	1604.93	0.91833	0.267011					Luttinen & Furnes 2000	-74.2	-14
Z.1816.2 (Ahlmannryggen)	45.6937	3.0192	6.39904	1.49639	11.2953	0.162571	22.8435	7.82476	0.971063	0.111433	0.183069	1626.02	0.924196	0.267011					Luttinen & Furnes 2000	-72.05	-2.71
VF-130-85	45.7527	1.07585	8.58191	0.529505	11.3271	0.163251	23.4718	7.75401	0.990887	0.210563	0.14244	1637.46	0.923258	0.356655					Luttinen & Furnes 2000	-74.2	-14
5-MK-91	44.913	1.14296	7.91974	0.568892	12.4873	0.179832	23.7522	7.49009	1.32886	0.121595	0.0955391	1642.5	0.920936	0.188614					Luttinen & Furnes 2000	-74.2	-14
47139–7 (Schirmacher Oasis)	46.8059	0.841084	10.2122	0.420241	10.482	0.37495	17.974	9.92741	2.19345	0.563737	0.204995	1529.31	0.907803	0.0811158	1582	3.79246	3.72363		Sushchevskaya et al. 2009	-77.75	11.75
Etendeka
JVT-09-06	45.8079	1.12092	12.7041	0.563886	10.1846	0.185147	17.3803	9.89375	1.74177	0.31576	0.101858	1516.19	0.907853	0.0825895	1565	3.62241	3.59143		Keiding et al. 2011	21.424	-13.897
JVT-09-21	45.5191	0.90051	12.0082	0.445896	10.7916	0.181399	18.6022	9.66555	1.6383	0.162285	0.0850063	1542.81	0.909009	0.0814307	1592	4.01309	3.66024		Keiding et al. 2011	21.424	-13.897
JVT-09-22	45.4738	1.00319	14.0509	0.509533	9.88602	0.174743	16.2632	10.5551	1.75712	0.201637	0.124823	1490.4	0.905225	0.034446	1528	3.38694	3.23894		Keiding et al. 2011	21.424	-13.896
JVT-09-26	45.8071	1.12072	12.7018	0.560115	10.1878	0.185139	17.3864	9.89197	1.74145	0.315701	0.101839	1516.32	0.907858	0.0825721	1565	3.62398	3.59375		Keiding et al. 2011	21.278	-14.475
JVT-09-28	45.2589	0.955841	12.4561	0.474465	10.7468	0.178993	18.4	9.79302	1.49613	0.157053	0.0826594	1538.5	0.908701	0.0721461	1591	3.93725	3.74287		Keiding et al. 2011	21.281	-14.479
JVT-09-31	45.6376	0.945049	13.9075	0.470637	9.89488	0.173532	16.3723	10.5395	1.71893	0.248187	0.0919213	1492.99	0.905484	0.0434324	1532	3.40594	3.27495		Keiding et al. 2011	21.298	-14.651
JVT-09-32	45.6354	0.884747	13.8826	0.442583	9.95214	0.177854	16.8774	10.4341	1.44884	0.190358	0.0740283	1504.77	0.907315	0.0795897	1546	3.50432	3.37852		Keiding et al. 2011	21.31	-14.711
KHP-18a	46.8419	0.521328	12.8806	0.26095	9.78877	0.176802	17.6522	10.2905	1.27812	0.298228	0.010651	1522.24	0.910802	0.198433	1539	3.6959	2.82181		Keiding et al. 2011	-21.75	14.97
Q22	47.1235	0.736106	12.2873	0.367352	9.73963	0.171792	17.6785	9.95268	1.50808	0.33835	0.0966715	1522.83	0.911121	0.213301	1534	3.70341	2.69567		Keiding et al. 2011	21.976	-15.132
KLS108	45.5921	0.937352	11.6129	0.463717	10.8322	0.172755	18.6787	9.6745	1.56081	0.377006	0.0980216	1544.42	0.908972	0.0809541	1592	4.04303	3.63928		Marsh et al. 2001	-21.8	13.9
ATB-18	47.1854	0.663229	12.1048	0.330564	9.84523	0.162942	17.8589	9.7427	1.7756	0.292786	0.0377788	1526.8	0.911244	0.206966	1542	3.7567	2.80687		Marsh et al. 2007	-20.1879	14.1773
ATB-23	47.1937	0.543438	10.9475	0.26963	10.154	0.174782	19.5676	9.60391	1.31193	0.201217	0.0321947	1562.86	0.915743	0.300452	1525	4.4427	1.70835		Marsh et al. 2007	-20.1932	14.1736
97SB37	46.4924	1.026	12.3994	0.511854	9.89605	0.158371	17.5991	10.001	1.59661	0.216012	0.10331	1521.07	0.91027	0.166916	1548	3.68098	3.07046		Thompson et al. 2001	-21.3113	14.442
VB18	47.1536	0.57508	12.4615	0.286627	9.62343	0.159472	18.0008	9.99204	1.42389	0.268135	0.0554763	1529.89	0.913438	0.275809	1516	3.80097	2.15567		Thompson et al. 2007	-21.83	15.13
RD324	48.2053	0.574677	13.3567	0.285063	8.92949	0.164102	16.244	10.1851	1.71038	0.289078	0.0562096	1489.94	0.910193	0.26251	1441	3.38368	1.31985		Trumbull et al. 2007	-21.75	15.4
349	47.0854	0.839662	11.9021	0.417326	9.85283	0.179218	18.6564	9.5096	1.27349	0.172093	0.11186	1543.95	0.914262	0.28659	1527	4.03426	2.11054		Trumbull et al. 2007	-21.56	15.38
352A	46.8475	0.823542	11.8777	0.409155	9.90507	0.179349	18.7684	9.68044	1.20189	0.196053	0.110813	1546.32	0.91464	0.284505	1529	4.07903	2.11796		Trumbull et al. 2007	-21.54	15.4
377	48.2595	0.637818	12.1702	0.317917	9.29243	0.17148	17.3169	9.93561	1.32777	0.486227	0.0841546	1514.76	0.911717	0.28814	1485	3.60629	1.76671		Trumbull et al. 2007	-22.66	14.9
1. XFo is the molecular Fe/Mg ratio of equilibrium olivine
2. F where F < 0.01 a value of zero is given.
3. TOL is the temperature calculated at Pf and used in the Pf-T diagram (Fig. 1)
4. Pi this can only be determined for primary melts with MgO <20 weight %
5. Values obtained from equilibrium olivine at 5 GPa

## Sheet: References
BERTRAND H., MILLOT G. ; CONTINENTAL THOLEIITIC MAGMATISM OF THE IBERIAN MARGIN, PRECURSOR OF THE OPENING OF CENTRAL ATLANTIC: THE DOLERITES OF THE MESSEJANA-PLASENCIA DYKE (PORTUGAL-SPAIN) ; COMPT. REND. ACAD. SCI. PARIS SER. 2A 304 [1987] 215-220
BREWER T. S., HERGT J. M., HAWKESWORTH C. J., REX D. C., STOREY B. C. ; COATS LAND DOLERITES AND THE GENERATION OF ANTARCTIC CONTINENTAL FLOOD BASALTS ; SPEC. PUBL. GEOL. SOC. LONDON 68 [1992] 185-208
CEBRIA J.-M., LOPEZ RUIZ J., DOBLAS M., MARTINS L. T., MUNHA J. ; GEOCHEMISTRY OF THE EARLY JURASSIC MESSEJANA-PLASENCIA DYKE (PORTUGAL-SPAIN); IMPLICATIONS ON THE ORIGIN OF THE CENTRAL ATLANTIC MAGMATIC PROVINCE ; J. PETROL. 44 [2003] 547-568
ELLAM R. M., COX K. G. ; A PROTEROZOIC LITHOSPHERIC SOURCE FOR KAROO MAGMATISM: ECIDENCE FROM THE NUANETSI PICRITES ; EARTH PLANET. SCI. LETT. 92 [1989] 207-218
GROSSMAN J. N., GOTTFRIED D., FROELICH A. J. ; GEOCHEMICAL DATA FOR JURASSIC DIABASE ASSOCIATED WITH EARLY MESOZOIC BASINS IN THE EASTERN UNITED STATES ; U. S. GEOL. SURV. OPEN FILE REPT. 91-322-J [1991]
GUNN B. M. ; MODAL AND ELEMENT VARIATION IN ANTARCTIC THOLEIITES ; GEOCHIM. COSMOCHIM. ACTA 30 [1966] 881-920
HARMER R. E., LEE C. A., EGLINGTON B. M. ; A DEEP MANTLE SOURCE FOR CARBONATITE MAGMATISM: EVIDENCE FROM THE NEPHELINITES AND CARBONATITES OF THE BUHERA DISTRICT, SE ZIMBABWE ; EARTH PLANET. SCI. LETT. 158 [1998] 131-142
HEINONEN J. S., CARLSON R. W., LUTTINEN A. V. ; ISOTOPIC (SR, ND, PB, AND OS) COMPOSITION OF HIGHLY MAGNESIAN DIKES OF VESTFJELLA, WESTERN DRONNING MAUD LAND, ANTARCTICA: A KEY TO THE ORIGINS OF THE JURASSIC KAROO LARGE IGNEOUS PROVINCE? ; CHEM. GEOL. 277 [2010] 227-244
HEINONEN J. S., LUTTINEN A. V. ; MINERAL CHEMICAL EVIDENCE FOR EXTREMELY MAGNESIAN SUBALKALINE MELTS FROM THE ANTARCTIC EXTENSION OF THE KAROO LARGE IGNEOUS PROVINCE ; MIN. PETROL. 99 [2010] 201-217
KEIDING J. K., TRUMBULL R. B., VEKSLER I. V., JERRAM D. A. ; ON THE SIGNIFICANCE OF ULTRA-MAGNESIAN OLIVINES IN BASALTIC ROCKS ; GEOLOGY 39 [2011] 1095-1098
LUTTINEN A. V., FURNES H. ; FLOOD BASALTS OF VESTFJELLA: JURASSIC MAGMATISM ACROSS AN ARCHAEAN-PROTEROZOIC LITHOSPHERIC BOUNDARY IN DRONNING MAUD LAND, ANTARCTICA ; J. PETROL. 41 [2000] 1271-1305
MARSH J. S., EWART A., MILNER S. C., DUNCAN R. A., MILLER R. MCG. ; THE ETENDEKA IGNEOUS PROVINCE: MAGMA TYPES AND THEIR STRATIGRAPHIC DISTRIBUTION WITH IMPLICATIONS FOR THE EVOLUTION OF THE PARANA-ETENDEKA FLOOD BASALT PROVINCE ; BULL. VOLCANOL. 62 [2001] 464-486
MARSH J. S., MILNER S. C. ; STRATIGRAPHIC CORRELATION OF THE AWAHAB AND TAFELBERG FORMATIONS, ETENDEKA GROUP, NAMIBIA, AND LOCATION OF AN ERUPTIVE SITE FOR FLOOD BASALT VOLCANISM ; J. AFR. EARTH SCI. 48 [2007] 329-340
MARTINS L. T., MADEIRA J., YOUBI N., MUNHA J., MATA J., KERRICH R. ; RIFT-RELATED MAGMATISM OF THE CENTRAL ATLANTIC MAGMATIC PROVINCE IN ALGARVE, SOUTHERN PORTUGAL ; LITHOS 101 [2008] 102-124
RILEY T. R., CURTIS M. L., LEAT P. T., WATKEYS M. K., DUNCAN R. A., MILLAR I. L., OWENS W. H. ; OVERLAP OF KAROO AND FERRAR MAGMA TYPES IN KWAZULU-NATAL, SOUTH AFRICA ; J. PETROL. 47 [2006] 541-566
STARKEY N. A., STUART F. M., ELLAM R. M., FITTON J. G., BASU S., LARSEN L. M. ; HELIUM ISOTOPES IN EARLY ICELAND PLUME PICRITES: CONSTRAINTS ON THE COMPOSITION OF HIGH 3HE/4HE MANTLE ; EARTH PLANET. SCI. LETT. 277 [2009] 91-100
SUSHCHEVSKAYA N. M., BELYATSKII B. V., LEICHENKOV G. L., LAIBA A. A. ; EVOLUTION OF THE KAROO-MAUD MANTLE PLUME IN ANTARCTICA AND ITS INFLUENCE ON THE MAGMATISM OF THE EARLY STAGES OF INDIAN OCEAN OPENING ; GEOCHEM. INT. 47 [2009] 1-17
THOMPSON R. N., GIBSON S. A., DICKIN A. P., SMITH P. M. ; EARLY CRETACEOUS BASALT AND PICRITE DYKES OF THE SOUTHERN ETENDEKA REGION, NW NAMIBIA: WINDOWS INTO THE ROLE OF THE TRISTAN MANTLE PLUME IN PARANA-ETENDEKA MAGMATISM ; J. PETROL. 42 [2001] 2049-2081
THOMPSON R. N., RICHES A. J. V., ANTOSHECHKINA P. M., PEARSON D. G., NOWELL G. M., OTTLEY C. J., DICKIN A. P., HARDS V. L., NGUNO A.-K., NIKU-PAAVOLA V. ; ORIGIN OF CFB MAGMATISM: MULTI-TIERED INTRACRUSTAL PICRITE-RHYOLITE MAGMATIC PLUMBING AT SPITZKOPPE, WESTERN NAMIBIA, DURING EARLY CRETACEOUS ETENDEKA MAGMATISM ; J. PETROL. 48 [2007] 1119-1154
TRUMBULL R. B., REID D. L., DE BEER C., VAN ACKEN D., ROMER R. L. ; MAGMATISM AND CONTINENTAL BREAKUP AT THE WESTERN MARGIN OF SOUTHERN AFRICA: A GEOCHEMICAL COMPARISON OF DOLERITE DIKES FROM NORTHWESTERN NAMIBIA AND THE WESTERN CAPE ; S. AFR. J. GEOL. 110 [2007] 477-502
WILHELM S., WÖRNER G. ; CRYSTAL SIZE DISTRIBUTION IN JURASSIC FERRAR FLOWS AND SILLS (VICTORIA LAND, ANTARCTICA): EVIDENCE FOR PROCESSES OF COOLING, NUCLEATION, AND CRYSTALLIZATION ; CONTRIB. MINERAL. PETROL. 125 [1996] 1-15
ZAVALA K., LEITCH A. M., FISHER G. W. ; SILICIC SEGREGATIONS OF THE FERRAR DOLERITE SILLS, ANTARCTICA ; J. PETROL. 52 [2011] 1927-1964
